# Supplementary material for: Does written informed consent adequately inform surgical patients? A cross sectional study
Source: PubMed Central journal article supplement (PMC6323683; doi:10.1186/s12910-018-0340-z), 2019-01-07
Supplement: 12910_2018_340_MOESM1_ESM.pdf [file 12910_2018_340_MOESM1_ESM.pdf]

## Patient's informed consent to surgical procedure

Date of the interview \_\_\_\_\_ Hospital \_\_\_\_\_  
Department \_\_\_\_\_

1) Sex

M  F

2) Age

<18  18-40  41-60  61-80  >80

3) Nationality

Italian

Other \_\_\_\_\_

4) What is your marital status?

Unmarried  Married

Widow /Widower  Separate/Divorced

5) What is your higher level of education?

Primary School  Middle School (professional qualifications)

High School  College/University

6) Date of surgical procedure \_\_\_\_\_

7) Type of admission \_\_\_\_\_

Ordinary admission

Day Hospital

### WRITTEN INFORMATION

8) Have you received a written Informed Consent (IC) form?

Yes

No

9) How long before the surgical procedure have you received the IC form?

- Just before
- Some hours before  The day before  Other \_\_\_\_\_

10) Who delivered the IC form?

- Operative surgeon
- Head physician
- Other physician of the surgical unit
- Other \_\_\_\_\_

11) Who signed the IC form?

- Patient
- Parent (if minor)
- Legal representative (if interdicted or unable person)
- Other \_\_\_\_\_

12) Did you read the IC form before signing it?

- Yes
- No (They just made me sign it; due to lack of time)
- No (I did not want to read it)
- Partially. Why?

\_\_\_\_\_

Distractedly. Why?

\_\_\_\_\_

13) Was the IC form understandable?

- Yes
- No
- Partially
- Other/Notes \_\_\_\_\_

## ORAL INFORMATION

1) Was the IC form explained during a conversation?

- Yes
- No
- Partially
- Notes \_\_\_\_\_

2) Did you receive further oral information about:

- Your condition: diagnosis?
- Prognosis?
- Type of the proposed treatment?
- Expected post-operative progress and possible recovery issues?
- Potential benefits of the proposed treatment?
- Potential inconveniences (complications) of the proposed treatment?
- Alternatives to the proposed treatment?
- Chances of success of the proposed treatment?
- Possible outcomes of a missed treatment?

3) When did you receive the further oral information?

- Progressively during pre-operative examination
- On admission
- Before entering the operating room
- On delivery of IC form
- Other \_\_\_\_\_

4) Did you understand what was proposed to you, was the language understandable?

- Yes
- No
- Partially \_\_\_\_\_
- Notes \_\_\_\_\_

5) Did IC form and/or oral information influence the decision to proceed to the surgical procedure?

- A lot  Somewhat  A little  No

6) If yes, which one mainly influenced your decision?

- Written IC form
- Oral information
- Both

7) Compared to the information received, how much would you want to know?

- More
- No more, no less
- Less

Less about risks and complications

8) Have you had the opportunity to ask any questions and have you obtained exhaustive answers?

- Yes, I asked questions and I had exhaustive answers
- Yes, I asked questions but I didn't have exhaustive answers
- No, I didn't ask any questions

9) Received information caused you

- More anxiety—your health
- Worsening of the symptoms
- More relief regard your health
- Improvement in symptoms

## HEALTH OUTCOMES

10) What was the outcome of your surgical procedure?

- Successful/normal
- Complications\_\_\_\_\_
- Hospital-acquired infections

11) Were the information received before the surgical procedure about the post-operative progress correct?

- Yes
- No, progress worse than expected
- No, progress better than expected

12) Did you receive instructions on the behaviors to keep after the discharge?

- Yes
- Yes, but I wanted more information
- No

13) Did you follow post-operative care indications?

- Yes
- No
- Partially\_\_\_\_\_
